# Supplementary material for: MAPK/ERK-CBP-RFPL-3 Mediates Adipose-Derived Stem Cell-Induced Tumor Growth in Breast Cancer Cells by Activating Telomerase Reverse Transcriptase Expression
Source: Hindawi journal article supplement (doi:10.1155/2022/8540535), 2022-06-07
Supplement: f1 [file 8540535.f1.zip]

|                                 | <b>231(D5)</b>   | <b>ASCs(D5)</b> | <b>ASCs+231(D5)</b> | <b>P Value</b>  |
|---------------------------------|------------------|-----------------|---------------------|-----------------|
| <b>SCF</b>                      | 102.66±18.74     | 489.26±37.48    | 841.06±71.06        | <i>P</i> <0.01  |
| <b>IL-6</b>                     | 221806.2±21912.8 | 20.59±0.08      | 760800.2±20346      | <i>P</i> <0.01  |
| <b>sCD31</b>                    | 1.96±1.29        | 1.39±0.57       | 1.75±0.42           | NS              |
| <b>MCP-1</b>                    | 19394.4±986.87   | 2.46±3.10       | 21440.26±808.32     | NS              |
| <b>MIP-1<math>\alpha</math></b> | 233.83±7.59      | 2.70±1.89       | 1190.98±10.32       | <i>P</i> <0.001 |
| <b>SDF-1</b>                    | 1.84±2.6         | 2.19±3.10       | 0.05±0.06           | <i>P</i> <0.01  |
| <b>VEGFA</b>                    | 740.82±176.32    | 0.83±0.09       | 1635.54±158.59      | <i>P</i> <0.05  |
| <b>TNF<math>\alpha</math></b>   | 2.03±0.41        | 0.68±0.02       | 2.21±0.04           | NS              |
| <b>MMP2</b>                     | 3161.04±140.36   | 2.37±0.19       | 170.08±5.69         | <i>P</i> <0.001 |
| <b>MMP3</b>                     | 3911.76±140.26   | 0.68±0.02       | 3543.65±167.51      | NS              |
| <b>MMP8</b>                     | 9.07±1.2         | 0.29±0.01       | 9.07±0.33           | NS              |
| <b>MMP9</b>                     | 89.47±11.83      | 1.51±0.04       | 86.57±2.08          | NS              |
| <b>MMP12</b>                    | 5313.4±202.1     | 1.90±0.02       | 2.22±0.2            | <i>P</i> <0.001 |

Note: The results are presented as the mean  $\pm$  SD of three independent experiments. NS no significance.
