# Supplementary material for: MAPK/ERK-CBP-RFPL-3 Mediates Adipose-Derived Stem Cell-Induced Tumor Growth in Breast Cancer Cells by Activating Telomerase Reverse Transcriptase Expression
Source: Hindawi journal article supplement (doi:10.1155/2022/8540535), 2022-06-07
Supplement: f1 [file 8540535.f1.zip]

|                | <b>231(D1)</b>    | <b>ASCs(D1)</b>  | <b>ASCs+231(D1)</b> | <b>P Value</b> |
|----------------|-------------------|------------------|---------------------|----------------|
| <b>SCF</b>     | 21.88±2.03        | 404.26±36.12     | 472.23±18.88        | <i>P</i> <0.01 |
| <b>IL-6</b>    | 93285.47±13923.26 | 3.26±0.32        | 81276.14±10057.7    | NS             |
| <b>sCD31</b>   | 2.15±0.7          | 0.80±0.13        | 0.99±0.23           | NS             |
| <b>MCP-1</b>   | 34979.01±4026.21  | 2.37±0.54        | 20108.1±5918.85     | <i>P</i> <0.05 |
| <b>MIP-1α5</b> | 646.55±25.32      | 2.28±0.42        | 385.55±22.17        | <i>P</i> <0.01 |
| <b>SDF-1</b>   | 50.59±14.77       | 0.02±0.02        | 3.655±2.44          | <i>P</i> <0.05 |
| <b>VEGFA</b>   | 433.25±72.01      | 0.39±0.06        | 156.86±16.62        | <i>P</i> <0.05 |
| <b>TNFα</b>    | 6.28±1.36         | 0.53±0.19        | 9.39±0.23           | NS             |
| <b>MMP2</b>    | 784.35±61.31      | 38.57±6.82       | 206.16±9.12         | <i>P</i> <0.05 |
| <b>MMP3</b>    | 3500.98±370.09    | 1.26±0.04        | 4046.53±336.62      | NS             |
| <b>MMP8</b>    | 22.98±0.91        | 8.36±0.78        | 9.24±0.21           | <i>P</i> <0.01 |
| <b>MMP9</b>    | 127.78±5.19       | 40544.20±1602.30 | 172.22±22.63        | NS             |
| <b>MMP12</b>   | 4470.76±40.33     | 3760.70±140.14   | 2372.7±166.3        | NS             |

Note: The results are presented as the mean ± SD of three independent experiments. NS no significance.
