# Supplementary material for: MAPK/ERK-CBP-RFPL-3 Mediates Adipose-Derived Stem Cell-Induced Tumor Growth in Breast Cancer Cells by Activating Telomerase Reverse Transcriptase Expression
Source: Hindawi journal article supplement (doi:10.1155/2022/8540535), 2022-06-07
Supplement: f1 [file 8540535.f1.zip]

|                                 | <b>231(D3)</b>    | <b>ASCs(D3)</b>  | <b>ASCs+231(D3)</b> | <b>P Value</b>  |
|---------------------------------|-------------------|------------------|---------------------|-----------------|
| <b>SCF</b>                      | 26.72±2.08        | 463.23±7.47      | 696.99±69.32        | <i>P</i> <0.01  |
| <b>IL-6</b>                     | 109873.25±7506.71 | 357395.15±6866.  | 7.26±2.06           | <i>P</i> <0.01  |
| <b>sCD31</b>                    | 2.71±0.89         | 1.30±0.21        | 1.44±0.02           | NS              |
| <b>MCP-1</b>                    | 30836.14±1263.16  | 34901.78±2997.30 | 3.11±0.06           | <i>P</i> <0.01  |
| <b>MIP-1<math>\alpha</math></b> | 492.07±22.82      | 1694.36±351.18   | 1.65±0.07           | NS              |
| <b>SDF-1</b>                    | 24.53±6.29        | 4.83±6.79        | 2.19±3.09           | NS              |
| <b>VEGFA</b>                    | 694.27±51.43      | 710.18±174.29    | 0.82±0.08           | <i>P</i> <0.05  |
| <b>TNF<math>\alpha</math></b>   | 2.62±0.15         | 3.66±0.85        | 0.47±0.17           | NS              |
| <b>MMP2</b>                     | 2.32±0.66         | 2.87±0.22        | 14335.79±497.7      | <i>P</i> <0.001 |
| <b>MMP3</b>                     | 0.82±0.09         | 0.80±0.11        | 4536.25±105.51      | <i>P</i> <0.001 |
| <b>MMP8</b>                     | 0.34±0.02         | 0.31±0.03        | 42.27±2.2           | <i>P</i> <0.001 |
| <b>MMP9</b>                     | 1.94±0.23         | 1.35±0.11        | 684.16±26.39        | <i>P</i> <0.001 |
| <b>MMP12</b>                    | 2.3±0.14          | 2.05±0.21        | 6960.7±92.49        | <i>P</i> <0.001 |

Note: The results are presented as the mean  $\pm$  SD of three independent experiments. NS no significance.
