# Supplementary material for: MAPK/ERK-CBP-RFPL-3 Mediates Adipose-Derived Stem Cell-Induced Tumor Growth in Breast Cancer Cells by Activating Telomerase Reverse Transcriptase Expression
Source: Hindawi journal article supplement (doi:10.1155/2022/8540535), 2022-06-07
Supplement: f1 [file 8540535.f1.zip]

| RNA oligo or shRNA | Sequences                                                                                                                                                |
|--------------------|----------------------------------------------------------------------------------------------------------------------------------------------------------|
| siRNA-RFPL-3       | F:5'-GUGGGAACAAGCACAGAAUTT-3'<br>R:5'-AUAUCCACUUGGAACUUCCTT-3'                                                                                           |
| si-CBP             | F: 5'-GAGGUCGCGUUUACAUAATT-3'<br>R: 5'-UUUAUGUAAACGCGACCUCTT-3'                                                                                          |
| si-Control         | F: 5'-UUCUCCGAACGUGUCACGUTT-3'<br>R: 5'-ACGUGACACGUUCGGAGAATT-3'                                                                                         |
| shRNA-CBP          | F:5'-GGACAGCACACCTCTAAGAAGCT<br>CTGACAGGGTGTTCGTCCTTTC-3'<br>R:5'-CCATCTCTTGAATGGAATGTGGAG<br>GTTGGGAGGGAAAGAGTGATC -3'                                  |
| shRNA-control      | F:5'TGCTGAAATGTACTGCGCGTGGAGACGTTTT<br>GGCCACTGACTGACGTCTCCACGCAGTACATTT-3'<br>R:5'CCTGAAATGTACTGCGTGGAGACGTCAGTC<br>AGTGGCCAAAACGTCTCCACGCAGTACATTTC-3' |

Note: F stands for forward; R stands for reverse.
