# Supplementary material for: MAPK/ERK-CBP-RFPL-3 Mediates Adipose-Derived Stem Cell-Induced Tumor Growth in Breast Cancer Cells by Activating Telomerase Reverse Transcriptase Expression
Source: Hindawi journal article supplement (doi:10.1155/2022/8540535), 2022-06-07
Supplement: f1 [file 8540535.f1.zip]

| <b>Primer</b> | <b>Sequences</b>                                                  |
|---------------|-------------------------------------------------------------------|
| <i>RFPL-3</i> | F:5'-GTCTGCCTCAAGTGCATCAA-3'<br>R:5'-AGCCTCTCTAGCTGCCGATT-3'      |
| <i>CBP</i>    | F:5'-GATGGCCGAGAACTTGCTGGAC-3'<br>R:5'-TCTGTGTTGTCATTCGCGGAGAA-3' |
| <i>hTERT</i>  | F:5'-ACGACGTGCTGGTTCACCT-3'<br>R:5'-CTCCCTGACGCTATGGTTCC-3'       |
| <i>GAPDH</i>  | F:5'-AGGTCGGTGTGAACGGATTTG-3'<br>R:5'-GGGGTCGTTGATGGCAACA-3'      |

Note: F stands for forward; R stands for reverse.
