# Supplementary figures and images for: MAPK/ERK-CBP-RFPL-3 Mediates Adipose-Derived Stem Cell-Induced Tumor Growth in Breast Cancer Cells by Activating Telomerase Reverse Transcriptase Expression
Source: Hindawi journal article supplement (doi:10.1155/2022/8540535), 2022-06-07

**A**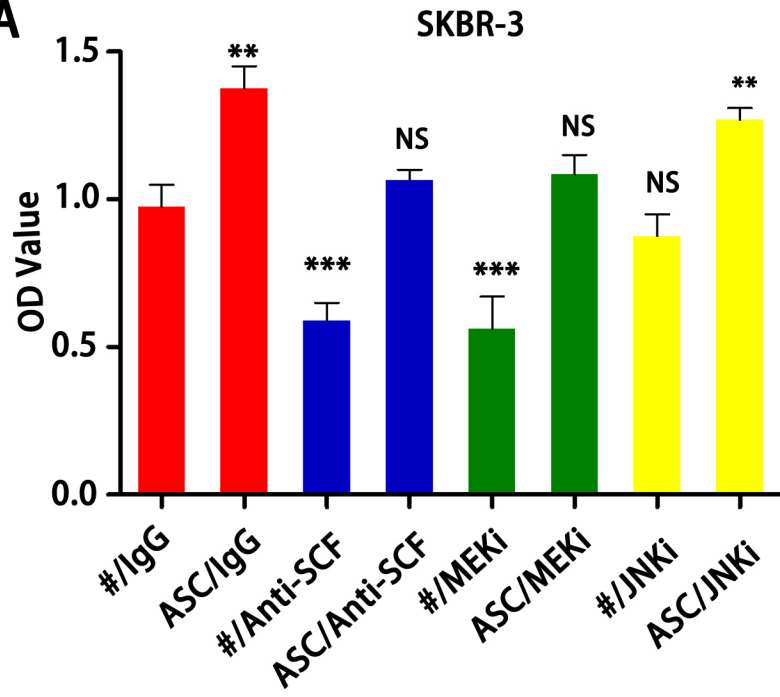**B**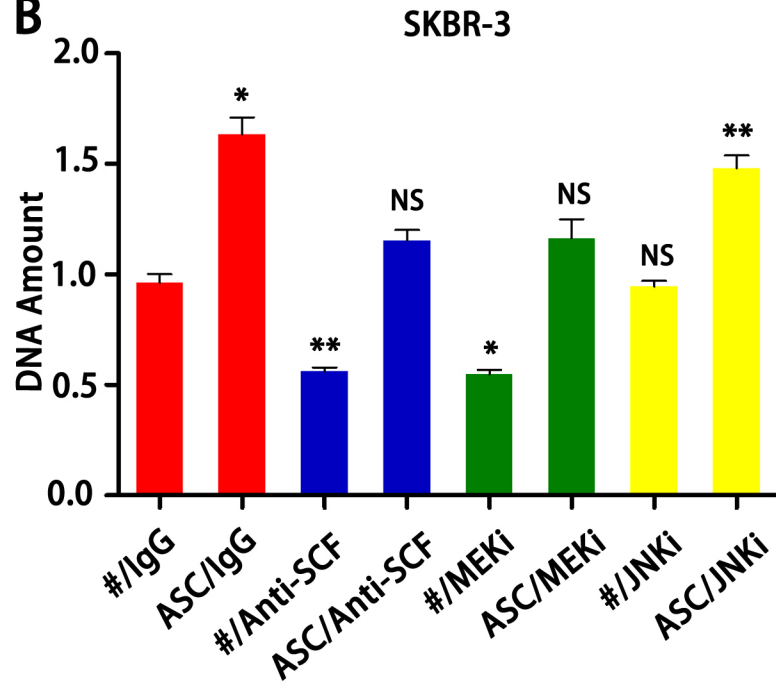

Supplement: f1 [file 8540535.f1.zip]

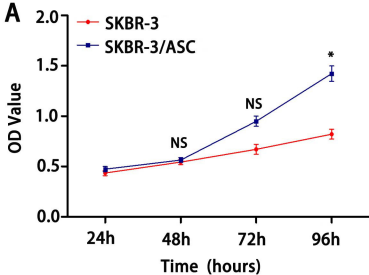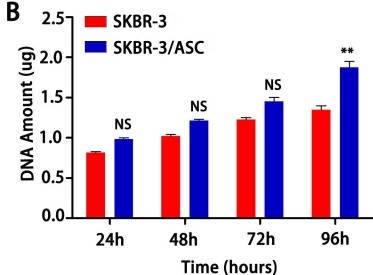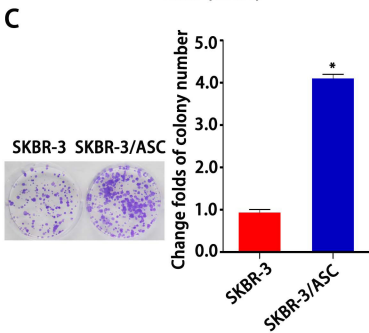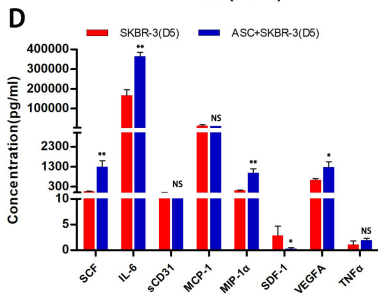

Supplement: f1 [file 8540535.f1.zip]

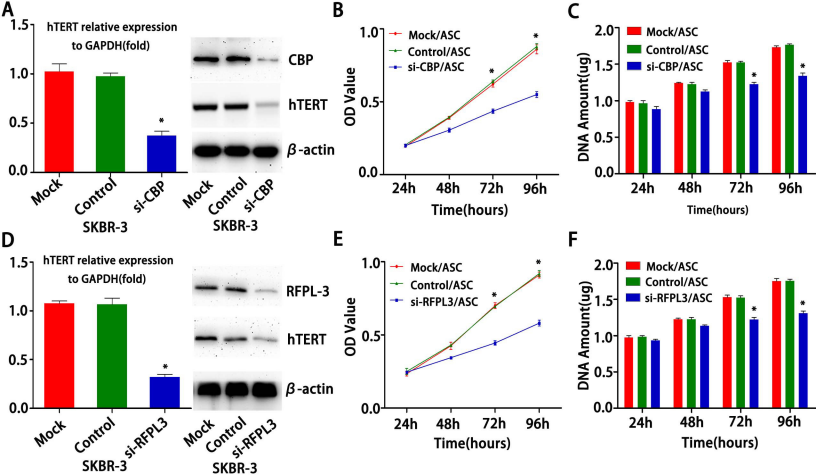

Supplement: f1 [file 8540535.f1.zip]

**A****RFPL-3/Input**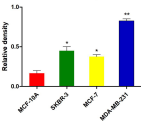**B****CBP/Input**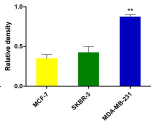**C****RFPL-3/Input**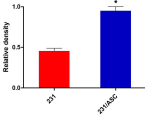**D****CBP/Input**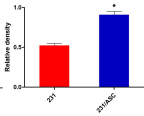

Supplement: f1 [file 8540535.f1.zip]

**A**

Relative luciferase activity

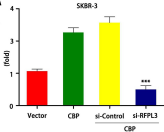**B**

Relative luciferase activity

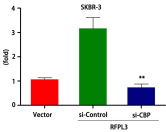

Supplement: f1 [file 8540535.f1.zip]

**A****p-ERK1/2/Tubulin**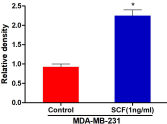**B****CBP/2/Tubulin**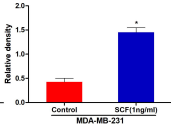

Supplement: f1 [file 8540535.f1.zip]
